# Supplementary material
Source: MDPI journal article supplement (https://www.mdpi.com/2073-4395/11/10/2001)
Supplement: s1 [file s1]

Table S1. Statistical differences for results obtained with FRAP method for paulownia leaf blades

| Zmn1              | {1}<br>M=194.80 | {2}<br>M=205.07 | {3}<br>M=342.83 | {4}<br>M=230.72 | {5}<br>M=360.69 | {6}<br>M=278.29 | {7}<br>M=280.26 | {8}<br>M=273.55 | {9}<br>M=344.01 | {10}<br>M=277.11 | {11}<br>M=479.21 | {12}<br>M=430.26 | {13}<br>M=206.64 | {14}<br>M=504.08 | {15}<br>M=362.37 | {16}<br>M=401.64 | {17}<br>M=374.80 | {18}<br>M=329.21 |
|-------------------|-----------------|-----------------|-----------------|-----------------|-----------------|-----------------|-----------------|-----------------|-----------------|------------------|------------------|------------------|------------------|------------------|------------------|------------------|------------------|------------------|
| OX 3 {1}          |                 | 0.999999        | 0.000169        | 0.504966        | 0.000169        | 0.000244        | 0.000216        | 0.000400        | 0.000169        | 0.000268         | 0.000169         | 0.000169         | 0.999994         | 0.000169         | 0.000169         | 0.000169         | 0.000169         | 0.000169         |
| SLO NN1 {2}       | 0.999999        |                 | 0.000169        | 0.924962        | 0.000169        | 0.000961        | 0.000683        | 0.002319        | 0.000169        | 0.001193         | 0.000169         | 0.000169         | 1.000000         | 0.000169         | 0.000169         | 0.000169         | 0.000169         | 0.000169         |
| ZAL A1 {3}        | 0.000169        | 0.000169        |                 | 0.000169        | 0.998042        | 0.005025        | 0.007406        | 0.001993        | 1.000000        | 0.003981         | 0.000169         | 0.008551         | 0.000169         | 0.000169         | 0.994397         | 0.015253         | 0.696089         | 0.999949         |
| COT 1 {4}         | 0.504966        | 0.924962        | 0.000169        |                 | 0.000169        | 0.111340        | 0.080772        | 0.224775        | 0.000169        | 0.133959         | 0.000169         | 0.000169         | 0.955458         | 0.000169         | 0.000169         | 0.000169         | 0.000169         | 0.000171         |
| US 1 {5}          | 0.000169        | 0.000169        | 0.998042        | 0.000169        |                 | 0.000266        | 0.000328        | 0.000200        | 0.999173        | 0.000242         | 0.000169         | 0.085499         | 0.000169         | 0.000169         | 1.000000         | 0.287815         | 0.999914         | 0.718941         |
| LUP 1-12 {6}      | 0.000244        | 0.000961        | 0.005025        | 0.111340        | 0.000266        |                 | 1.000000        | 1.000000        | 0.003981        | 1.000000         | 0.000169         | 0.000169         | 0.001280         | 0.000169         | 0.000234         | 0.000169         | 0.000172         | 0.064014         |
| WEG 9 PEG {7}     | 0.000216        | 0.000683        | 0.007406        | 0.080772        | 0.000328        | 1.000000        |                 | 1.000000        | 0.005869        | 1.000000         | 0.000169         | 0.000169         | 0.000895         | 0.000169         | 0.000273         | 0.000169         | 0.000174         | 0.089060         |
| A4 ST A2 {8}      | 0.000400        | 0.002319        | 0.001993        | 0.224775        | 0.000200        | 1.000000        | 1.000000        |                 | 0.001593        | 1.000000         | 0.000169         | 0.000169         | 0.003154         | 0.000169         | 0.000190         | 0.000169         | 0.000170         | 0.027587         |
| Lu Hg 12 {9}      | 0.000169        | 0.000169        | 1.000000        | 0.000169        | 0.999173        | 0.003981        | 0.005869        | 0.001593        |                 | 0.003154         | 0.000169         | 0.010055         | 0.000169         | 0.000169         | 0.997274         | 0.019085         | 0.749876         | 0.999832         |
| LuP 3-7 {10}      | 0.000268        | 0.001193        | 0.003981        | 0.133959        | 0.000242        | 1.000000        | 1.000000        | 0.003154        |                 |                  | 0.000169         | 0.000169         | 0.001593         | 0.000169         | 0.000218         | 0.000169         | 0.000171         | 0.052177         |
| 9503 UR {11}      | 0.000169        | 0.000169        | 0.000169        | 0.000169        | 0.000169        | 0.000169        | 0.000169        | 0.000169        | 0.000169        | 0.000169         |                  | 0.568625         | 0.000169         | 0.941567         | 0.000169         | 0.000469         | 0.000170         | 0.000169         |
| 9503 II/7 UR {12} | 0.000169        | 0.000169        | 0.008551        | 0.000169        | 0.085499        | 0.000169        | 0.000169        | 0.000169        | 0.010055        | 0.000169         | 0.568625         |                  | 0.000169         | 0.051360         | 0.103703         | 0.991765         | 0.355815         | 0.001325         |
| 4C S9 {13}        | 0.999994        | 1.000000        | 0.000169        | 0.955458        | 0.000169        | 0.001280        | 0.000895        | 0.003154        | 0.000169        | 0.001593         | 0.000169         | 0.000169         |                  | 0.000169         | 0.000169         | 0.000169         | 0.000169         | 0.000169         |
| 9501 UR {14}      | 0.000169        | 0.000169        | 0.000169        | 0.000169        | 0.000169        | 0.000169        | 0.000169        | 0.000169        | 0.000169        | 0.000169         | 0.941567         | 0.051360         | 0.000169         |                  | 0.000169         | 0.000170         | 0.000169         | 0.000169         |
| SH 7 UR {15}      | 0.000169        | 0.000169        | 0.994397        | 0.000169        | 1.000000        | 0.000234        | 0.000273        | 0.000190        | 0.997274        | 0.000218         | 0.000169         | 0.103703         | 0.000169         | 0.000169         |                  | 0.353341         | 0.999987         | 0.639602         |
| LuP 4/20 A {16}   | 0.000169        | 0.000169        | 0.015253        | 0.000169        | 0.287815        | 0.000169        | 0.000169        | 0.000169        | 0.019085        | 0.000169         | 0.000469         | 0.991765         | 0.000169         | 0.000170         | 0.353341         |                  | 0.894710         | 0.001112         |
| LuP 4/20 B {17}   | 0.000169        | 0.000169        | 0.696089        | 0.000169        | 0.999914        | 0.000172        | 0.000174        | 0.000170        | 0.749876        | 0.000171         | 0.000170         | 0.355815         | 0.000169         | 0.000169         | 0.999987         | 0.894710         |                  | 0.151027         |
| SH 6 UR {18}      | 0.000169        | 0.000169        | 0.999949        | 0.000171        | 0.718941        | 0.064014        | 0.089060        | 0.027587        | 0.999832        | 0.052177         | 0.000169         | 0.001325         | 0.000169         | 0.000169         | 0.639602         | 0.001112         | 0.151027         |                  |

The values marked in red indicate statistically significant differences at  $p < 0.05$  (Tukey's test).

Table S2. Statistical differences for results obtained with DPPH method for paulownia leaf blades

| Zmn1              | {1}<br>M=162.99 | {2}<br>M=129.27 | {3}<br>M=221.89 | {4}<br>M=180.97 | {5}<br>M=180.23 | {6}<br>M=167.72 | {7}<br>M=190.42 | {8}<br>M=220.32 | {9}<br>M=261.23 | {10}<br>M=212.45 | {11}<br>M=334.07 | {12}<br>M=296.75 | {13}<br>M=162.76 | {14}<br>M=335.19 | {15}<br>M=299.00 | {16}<br>M=319.46 | {17}<br>M=292.71 | {18}<br>M=271.35 |
|-------------------|-----------------|-----------------|-----------------|-----------------|-----------------|-----------------|-----------------|-----------------|-----------------|------------------|------------------|------------------|------------------|------------------|------------------|------------------|------------------|------------------|
| OX 3 {1}          |                 | 0.077370        | 0.000201        | 0.902630        | 0.929438        | 1.000000        | 0.304725        | 0.000226        | 0.000169        | 0.000998         | 0.000169         | 0.000169         | 1.000000         | 0.000169         | 0.000169         | 0.000169         | 0.000169         | 0.000169         |
| SLO NN1 {2}       | 0.077370        |                 | 0.000169        | 0.000571        | 0.000677        | 0.022402        | 0.000183        | 0.000169        | 0.000169        | 0.000169         | 0.000169         | 0.000169         | 0.081866         | 0.000169         | 0.000169         | 0.000169         | 0.000169         | 0.000169         |
| ZAL A1 {3}        | 0.000201        | 0.000169        |                 | 0.011218        | 0.009076        | 0.000344        | 0.132038        | 1.000000        | 0.017482        | 0.999928         | 0.000169         | 0.000432         | 0.000199         | 0.000169         | 0.000169         | 0.000169         | 0.000169         | 0.000998         |
| COT 1 {4}         | 0.902630        | 0.000571        | 0.011218        |                 | 1.000000        | 0.994296        | 0.999928        | 0.017482        | 0.000169        | 0.132038         | 0.000169         | 0.000169         | 0.893209         | 0.000169         | 0.000169         | 0.000169         | 0.000169         | 0.000169         |
| US 1 {5}          | 0.929438        | 0.000677        | 0.009076        | 1.000000        |                 | 0.997061        | 0.999790        | 0.014192        | 0.000169        | 0.111220         | 0.000169         | 0.000169         | 0.921738         | 0.000169         | 0.000169         | 0.000169         | 0.000169         | 0.000169         |
| LUP 1-12 {6}      | 1.000000        | 0.022402        | 0.000344        | 0.994296        | 0.997061        |                 | 0.622231        | 0.000462        | 0.000169        | 0.003733         | 0.000169         | 0.000169         | 1.000000         | 0.000169         | 0.000169         | 0.000169         | 0.000169         | 0.000169         |
| WEG 9 PEG {7}     | 0.304725        | 0.000183        | 0.132038        | 0.999928        | 0.999790        | 0.622231        |                 | 0.186608        | 0.000169        | 0.669758         | 0.000169         | 0.000169         | 0.292038         | 0.000169         | 0.000169         | 0.000169         | 0.000169         | 0.000169         |
| A4 ST A2 {8}      | 0.000226        | 0.000169        | 1.000000        | 0.017482        | 0.014192        | 0.000462        | 0.186608        |                 | 0.011218        | 0.999995         | 0.000169         | 0.000352         | 0.000221         | 0.000169         | 0.000169         | 0.000169         | 0.000169         | 0.000666         |
| Lu Hg 12 {9}      | 0.000169        | 0.000169        | 0.017482        | 0.000169        | 0.000169        | 0.000169        | 0.000169        | 0.011218        |                 | 0.001192         | 0.000169         | 0.449731         | 0.000169         | 0.000169         | 0.027031         | 0.000210         | 0.132038         | 0.999810         |
| LuP 3-7 {10}      | 0.000998        | 0.000169        | 0.999928        | 0.132038        | 0.111220        | 0.003733        | 0.669758        | 0.999995        | 0.001192        |                  | 0.000169         | 0.000194         | 0.000934         | 0.000169         | 0.000169         | 0.000169         | 0.000169         | 0.000201         |
| 9503 UR {11}      | 0.000169        | 0.000169        | 0.000169        | 0.000169        | 0.000169        | 0.000169        | 0.000169        | 0.000169        | 0.000169        | 0.000169         |                  | 0.366200         | 0.000169         | 1.000000         | 0.055149         | 0.983992         | 0.009878         | 0.000177         |
| 9503 II/7 UR {12} | 0.000169        | 0.000169        | 0.000432        | 0.000169        | 0.000169        | 0.000169        | 0.000169        | 0.000352        | 0.449731        | 0.000194         | 0.366200         |                  | 0.000169         | 0.318505         | 1.000000         | 0.961033         | 1.000000         | 0.903442         |
| 4C S9 {13}        | 1.000000        | 0.081866        | 0.000199        | 0.893209        | 0.921738        | 1.000000        | 0.292038        | 0.000221        | 0.000169        | 0.000934         | 0.000169         | 0.000169         |                  | 0.000169         | 0.000169         | 0.000169         | 0.000169         | 0.000169         |
| 9501 UR {14}      | 0.000169        | 0.000169        | 0.000169        | 0.000169        | 0.000169        | 0.000169        | 0.000169        | 0.000169        | 0.000169        | 0.000169         | 1.000000         | 0.318505         | 0.000169         |                  | 0.041199         | 0.967556         | 0.007159         | 0.000174         |
| SH 7 UR {15}      | 0.000169        | 0.000169        | 0.000169        | 0.000169        | 0.000169        | 0.000169        | 0.000169        | 0.000169        | 0.000169        | 0.027031         | 0.000169         | 0.055149         | 1.000000         | 0.000169         | 0.041199         |                  | 0.774713         | 0.292219         |
| LuP 4/20 A {16}   | 0.000169        | 0.000169        | 0.000169        | 0.000169        | 0.000169        | 0.000169        | 0.000169        | 0.000169        | 0.000169        | 0.000210         | 0.000169         | 0.983992         | 0.961033         | 0.000169         | 0.967556         | 0.774713         |                  | 0.001428         |
| LuP 4/20 B {17}   | 0.000169        | 0.000169        | 0.000169        | 0.000169        | 0.000169        | 0.000169        | 0.000169        | 0.000169        | 0.000169        | 0.132038         | 0.000169         | 0.009878         | 1.000000         | 0.000169         | 0.007159         | 1.000000         | 0.343942         | 0.716101         |
| SH 6 UR {18}      | 0.000169        | 0.000169        | 0.000998        | 0.000169        | 0.000169        | 0.000169        | 0.000169        | 0.000666        | 0.999810        | 0.000201         | 0.000177         | 0.903442         | 0.000169         | 0.000174         | 0.292219         | 0.001428         | 0.716101         |                  |

The values marked in red indicate statistically significant differences at  $p < 0.05$  (Tukey's test).



Table S3. Statistical differences for results obtained with ABTS method for paulownia leaf blades

| Zmn1              | {1}<br>M=278.61 | {2}<br>M=285.80 | {3}<br>M=481.50 | {4}<br>M=401.34 | {5}<br>M=680.44 | {6}<br>M=620.21 | {7}<br>M=407.97 | {8}<br>M=356.56 | {9}<br>M=468.78 | {10}<br>M=343.30 | {11}<br>M=583.21 | {12}<br>M=512.45 | {13}<br>M=316.21 | {14}<br>M=641.81 | {15}<br>M=542.86 | {16}<br>M=669.45 | {17}<br>M=504.16 | {18}<br>M=535.12 |
|-------------------|-----------------|-----------------|-----------------|-----------------|-----------------|-----------------|-----------------|-----------------|-----------------|------------------|------------------|------------------|------------------|------------------|------------------|------------------|------------------|------------------|
| OX 3 {1}          |                 | 1.000000        | 0.000189        | 0.038586        | 0.000169        | 0.000169        | 0.022668        | 0.589833        | 0.000246        | 0.846410         | 0.000169         | 0.001099         | 0.999287         | 0.000169         | 0.000169         | 0.000169         | 0.000171         | 0.000169         |
| SLO NN1 {2}       | 1.000000        |                 | 0.000212        | 0.066922        | 0.000169        | 0.000169        | 0.040317        | 0.739436        | 0.000335        | 0.934694         | 0.000169         | 0.001651         | 0.999962         | 0.000169         | 0.000169         | 0.000169         | 0.000173         | 0.000169         |
| ZAL A1 {3}        | 0.000189        | 0.000212        |                 | 0.542440        | 0.000200        | 0.010388        | 0.683567        | 0.032377        | 1.000000        | 0.010846         | 0.175013         | 1.000000         | 0.001104         | 0.001645         | 0.892952         | 0.000266         | 1.000000         | 0.963894         |
| COT 1 {4}         | 0.038586        | 0.066922        | 0.542440        |                 | 0.000169        | 0.000172        | 1.000000        | 0.994087        | 0.801098        | 0.929644         | 0.000354         | 0.576589         | 0.438608         | 0.000169         | 0.008185         | 0.000169         | 0.162945         | 0.015720         |
| US 1 {5}          | 0.000169        | 0.000169        | 0.000200        | 0.000169        |                 | 0.906538        | 0.000169        | 0.000169        | 0.000177        | 0.000169         | 0.000169         | 0.052376         | 0.000169         | 0.998992         | 0.011429         | 1.000000         | 0.000488         | 0.005907         |
| LUP 1-12 {6}      | 0.000169        | 0.000169        | 0.010388        | 0.000172        | 0.906538        |                 | 0.000176        | 0.000169        | 0.003486        | 0.000169         | 0.999421         | 0.627374         | 0.000169         | 1.000000         | 0.602717         | 0.983875         | 0.064421         | 0.439413         |
| WEG 9 PEG {7}     | 0.022668        | 0.040317        | 0.683567        | 1.000000        | 0.000169        | 0.000176        |                 | 0.975482        | 0.899708        | 0.846717         | 0.000521         | 0.676329         | 0.314930         | 0.000170         | 0.014329         | 0.000169         | 0.245531         | 0.027123         |
| A4 ST A2 {8}      | 0.589833        | 0.739436        | 0.032377        | 0.994087        | 0.000169        | 0.000169        | 0.975482        |                 | 0.085380        | 1.000000         | 0.000170         | 0.098443         | 0.998256         | 0.000169         | 0.000284         | 0.000169         | 0.004853         | 0.000424         |
| Lu Hg 12 {9}      | 0.000246        | 0.000335        | 1.000000        | 0.801098        | 0.000177        | 0.003486        | 0.899708        | 0.085380        |                 | 0.031012         | 0.072658         | 0.999953         | 0.003161         | 0.000615         | 0.672128         | 0.000194         | 0.999681         | 0.819912         |
| LuP 3-7 {10}      | 0.846410        | 0.934694        | 0.010846        | 0.929644        | 0.000169        | 0.000169        | 0.846717        | 1.000000        | 0.031012        |                  | 0.000169         | 0.999993         | 0.000169         | 0.000198         | 0.000169         | 0.000169         | 0.001572         | 0.000234         |
| 9503 UR {11}      | 0.000169        | 0.000169        | 0.175013        | 0.000354        | 0.230910        | 0.999421        | 0.000521        | 0.000170        | 0.072658        | 0.000169         |                  | 0.981109         | 0.000169         | 0.924141         | 0.998256         | 0.416507         | 0.566212         | 0.987312         |
| 9503 II/7 UR {12} | 0.001099        | 0.001651        | 1.000000        | 0.576589        | 0.052376        | 0.627374        | 0.676329        | 0.098443        | 0.999953        | 0.049184         | 0.981109         |                  | 0.010342         | 0.319844         | 1.000000         | 0.093097         | 1.000000         | 1.000000         |
| 4C S9 {13}        | 0.999287        | 0.999962        | 0.001104        | 0.438608        | 0.000169        | 0.000169        | 0.000169        | 0.998256        | 0.003161        | 0.999993         | 0.000169         | 0.010342         |                  | 0.000169         | 0.000170         | 0.000169         | 0.000266         | 0.000172         |
| 9501 UR {14}      | 0.000169        | 0.000169        | 0.001645        | 0.000169        | 0.998992        | 1.000000        | 0.000170        | 0.000169        | 0.000615        | 0.000169         | 0.924141         | 0.319844         | 0.000169         |                  | 0.208123         | 0.999991         | 0.011362         | 0.125973         |
| SH 7 UR {15}      | 0.000169        | 0.000169        | 0.892952        | 0.008185        | 0.011429        | 0.602717        | 0.014329        | 0.000284        | 0.672128        | 0.000198         | 0.998256         | 1.000000         | 0.000170         | 0.208123         |                  | 0.028373         | 0.998969         | 1.000000         |
| LuP 4/20 A {16}   | 0.000169        | 0.000169        | 0.000266        | 0.000169        | 1.000000        | 0.000169        | 0.000169        | 0.000169        | 0.000194        | 0.000169         | 0.416507         | 0.093097         | 0.000169         | 0.999991         | 0.028373         |                  | 0.001104         | 0.015016         |
| LuP 4/20 B {17}   | 0.000171        | 0.000173        | 1.000000        | 0.162945        | 0.000488        | 0.064421        | 0.245531        | 0.004853        | 0.999681        | 0.001572         | 0.566212         | 1.000000         | 0.000266         | 0.011362         | 0.998969         | 0.001104         |                  | 0.999951         |
| SH 6 UR {18}      | 0.000169        | 0.000169        | 0.963894        | 0.015720        | 0.005907        | 0.439413        | 0.027123        | 0.000424        | 0.819912        | 0.000234         | 0.987312         | 1.000000         | 0.000172         | 0.125973         | 1.000000         | 0.015016         | 0.999951         |                  |

The values marked in red indicate statistically significant differences at  $p < 0.05$  (Tukey's test).

Table S4. Statistical differences for total phenolic content (TPC) for paulownia leaf blades

| Zmn1              | {1}<br>M=39.397 | {2}<br>M=36.328 | {3}<br>M=60.938 | {4}<br>M=45.871 | {5}<br>M=76.670 | {6}<br>M=67.860 | {7}<br>M=48.493 | {8}<br>M=48.772 | {9}<br>M=64.955 | {10}<br>M=47.210 | {11}<br>M=80.469 | {12}<br>M=77.121 | {13}<br>M=42.522 | {14}<br>M=87.667 | {15}<br>M=76.116 | {16}<br>M=79.799 | {17}<br>M=67.132 | {18}<br>M=65.737 |
|-------------------|-----------------|-----------------|-----------------|-----------------|-----------------|-----------------|-----------------|-----------------|-----------------|------------------|------------------|------------------|------------------|------------------|------------------|------------------|------------------|------------------|
| OX 3 {1}          |                 | 0.824187        | 0.000169        | 0.009821        | 0.000169        | 0.000169        | 0.000211        | 0.000191        | 0.000169        | 0.000874         | 0.000169         | 0.000169         | 0.803821         | 0.000169         | 0.000169         | 0.000169         | 0.000169         | 0.000169         |
| SLO NN1 {2}       | 0.824187        |                 | 0.000169        | 0.000184        | 0.000169        | 0.000169        | 0.000169        | 0.000169        | 0.000169        | 0.000170         | 0.000169         | 0.000169         | 0.016271         | 0.000169         | 0.000169         | 0.000169         | 0.000169         | 0.000169         |
| ZAL A1 {3}        | 0.000169        | 0.000169        |                 | 0.000169        | 0.000169        | 0.004286        | 0.000169        | 0.000169        | 0.411249        | 0.000169         | 0.000169         | 0.000169         | 0.000169         | 0.000169         | 0.000169         | 0.000169         | 0.016271         | 0.157638         |
| COT 1 {4}         | 0.009821        | 0.000184        | 0.000169        |                 | 0.000169        | 0.000169        | 0.943633        | 0.878401        | 0.000169        | 0.999983         | 0.000169         | 0.000169         | 0.713022         | 0.000169         | 0.000169         | 0.000169         | 0.000169         | 0.000169         |
| US 1 {5}          | 0.000169        | 0.000169        | 0.000169        | 0.000169        |                 | 0.000250        | 0.000169        | 0.000169        | 0.000169        | 0.507813         | 1.000000         | 0.000169         | 0.000169         | 0.000170         | 1.000000         | 0.802281         | 0.000184         | 0.000170         |
| LUP 1-12 {6}      | 0.000169        | 0.000169        | 0.004286        | 0.000169        | 0.000250        |                 | 0.000169        | 0.000169        | 0.877569        | 0.000169         | 0.000169         | 0.008563         | 0.000169         | 0.000169         | 0.000445         | 0.000169         | 1.000000         | 0.992564         |
| WEG 9 PEG {7}     | 0.000211        | 0.000169        | 0.000169        | 0.943633        | 0.000169        | 0.000169        |                 | 1.000000        | 0.000169        | 0.999991         | 0.000169         | 0.000169         | 0.024194         | 0.000169         | 0.000169         | 0.000169         | 0.000169         | 0.000169         |
| A4 ST A2 {8}      | 0.000191        | 0.000169        | 0.000169        | 0.878401        | 0.000169        | 0.000169        | 1.000000        |                 | 0.000169        | 0.999840         | 0.000169         | 0.000169         | 0.014720         | 0.000169         | 0.000169         | 0.000169         | 0.000169         | 0.000169         |
| Lu Hg 12 {9}      | 0.000169        | 0.000169        | 0.411249        | 0.000169        | 0.000169        | 0.877569        | 0.000169        | 0.000169        |                 | 0.000169         | 0.000169         | 0.000303         | 0.000169         | 0.000169         | 0.000169         | 0.000169         | 0.990322         | 1.000000         |
| LuP 3-7 {10}      | 0.000874        | 0.000170        | 0.000169        | 0.999983        | 0.000169        | 0.000169        | 0.999991        | 0.999840        | 0.000169        |                  | 0.000169         | 0.000169         | 0.183950         | 0.000169         | 0.000169         | 0.000169         | 0.000169         | 0.000169         |
| 9503 UR {11}      | 0.000169        | 0.000169        | 0.000169        | 0.000169        | 0.507813        | 0.000169        | 0.000169        | 0.000169        | 0.000169        | 0.000169         |                  | 0.977382         | 0.000169         | 0.002568         | 0.282864         | 1.000000         | 0.000169         | 0.000169         |
| 9503 II/7 UR {12} | 0.000169        | 0.000169        | 0.000169        | 0.000169        | 1.000000        | 0.008563        | 0.000169        | 0.000169        | 0.000303        | 0.000169         | 0.977382         |                  | 0.000169         | 0.001610         | 1.000000         | 0.998016         | 0.003298         | 0.000603         |
| 4C S9 {13}        | 0.803821        | 0.016271        | 0.000169        | 0.713022        | 0.000169        | 0.000169        | 0.024194        | 0.014720        | 0.000169        | 0.183950         | 0.000169         | 0.000169         |                  | 0.000169         | 0.000169         | 0.000169         | 0.000169         | 0.000169         |
| 9501 UR {14}      | 0.000169        | 0.000169        | 0.000169        | 0.000169        | 0.000170        | 0.000169        | 0.000169        | 0.000169        | 0.000169        | 0.000169         | 0.002568         | 0.001610         | 0.000169         |                  | 0.000169         | 0.000800         | 0.000169         | 0.000169         |
| SH 7 UR {15}      | 0.000169        | 0.000169        | 0.000169        | 0.000169        | 1.000000        | 0.000445        | 0.000169        | 0.000169        | 0.000169        | 0.000169         | 0.282864         | 1.000000         | 0.000169         | 0.000169         |                  | 0.560873         | 0.000224         | 0.000171         |
| LuP 4/20 A {16}   | 0.000169        | 0.000169        | 0.000169        | 0.000169        | 0.802281        | 0.000169        | 0.000169        | 0.000169        | 0.000169        | 0.000169         | 1.000000         | 0.998016         | 0.000169         | 0.000169         | 0.560873         |                  | 0.000169         | 0.000169         |
| LuP 4/20 B {17}   | 0.000169        | 0.000169        | 0.016271        | 0.000169        | 0.000184        | 1.000000        | 0.000169        | 0.000169        | 0.990322        | 0.000169         | 0.000169         | 0.003298         | 0.000169         | 0.000169         | 0.000224         | 0.000169         |                  | 0.999969         |
| SH 6 UR {18}      | 0.000169        | 0.000169        | 0.157638        | 0.000169        | 0.000170        | 0.992564        | 0.000169        | 0.000169        | 1.000000        | 0.000169         | 0.000169         | 0.000603         | 0.000169         | 0.000169         | 0.000171         | 0.000169         | 0.999969         |                  |

The values marked in red indicate statistically significant differences at  $p < 0.05$  (Tukey's test).



Table S5. Statistical differences for total flavonoid content (TFC) for paulownia leaf blades

| Zmn1              | {1}<br>M=27.824 | {2}<br>M=31.981 | {3}<br>M=43.557 | {4}<br>M=28.924 | {5}<br>M=18.490 | {6}<br>M=16.170 | {7}<br>M=41.324 | {8}<br>M=35.725 | {9}<br>M=40.466 | {10}<br>M=32.634 | {11}<br>M=51.630 | {12}<br>M=61.969 | {13}<br>M=31.363 | {14}<br>M=75.641 | {15}<br>M=59.496 | {16}<br>M=46.443 | {17}<br>M=47.027 | {18}<br>M=54.137 |
|-------------------|-----------------|-----------------|-----------------|-----------------|-----------------|-----------------|-----------------|-----------------|-----------------|------------------|------------------|------------------|------------------|------------------|------------------|------------------|------------------|------------------|
| OX 3 {1}          |                 | 0.004903        | 0.000169        | 0.998858        | 0.000169        | 0.000169        | 0.000169        | 0.000169        | 0.000169        | 0.000732         | 0.000169         | 0.000169         | 0.030861         | 0.000169         | 0.000169         | 0.000169         | 0.000169         | 0.000169         |
| SLO NN1 {2}       | 0.004903        |                 | 0.000169        | 0.111399        | 0.000169        | 0.000169        | 0.000169        | 0.016978        | 0.000169        | 0.999999         | 0.000169         | 0.000169         | 1.000000         | 0.000169         | 0.000169         | 0.000169         | 0.000169         | 0.000169         |
| ZAL A1 {3}        | 0.000169        | 0.000169        |                 | 0.000169        | 0.000169        | 0.000169        | 0.562458        | 0.000169        | 0.102239        | 0.000169         | 0.000169         | 0.000169         | 0.000169         | 0.000169         | 0.000169         | 0.167614         | 0.037470         | 0.000169         |
| COT 1 {4}         | 0.998858        | 0.111399        | 0.000169        |                 | 0.000169        | 0.000169        | 0.000169        | 0.000169        | 0.000169        | 0.018781         | 0.000169         | 0.000169         | 0.410659         | 0.000169         | 0.000169         | 0.000169         | 0.000169         | 0.000169         |
| US 1 {5}          | 0.000169        | 0.000169        | 0.000169        | 0.000169        |                 | 0.496711        | 0.000169        | 0.000169        | 0.000169        | 0.000169         | 0.000169         | 0.000169         | 0.000169         | 0.000169         | 0.000169         | 0.000169         | 0.000169         | 0.000169         |
| LUP 1-12 {6}      | 0.000169        | 0.000169        | 0.000169        | 0.000169        | 0.496711        |                 | 0.000169        | 0.000169        | 0.000169        | 0.000169         | 0.000169         | 0.000169         | 0.000169         | 0.000169         | 0.000169         | 0.000169         | 0.000169         | 0.000169         |
| WEG 9 PEG {7}     | 0.000169        | 0.000169        | 0.562458        | 0.000169        | 0.000169        | 0.000169        |                 | 0.000200        | 0.999961        | 0.000169         | 0.000169         | 0.000169         | 0.000169         | 0.000169         | 0.000169         | 0.000359         | 0.000190         | 0.000169         |
| A4 ST A2 {8}      | 0.000169        | 0.016978        | 0.000169        | 0.000169        | 0.000169        | 0.000169        | 0.000200        |                 | 0.000875        | 0.102239         | 0.000169         | 0.000169         | 0.002612         | 0.000169         | 0.000169         | 0.000169         | 0.000169         | 0.000169         |
| Lu Hg 12 {9}      | 0.000169        | 0.000169        | 0.102239        | 0.000169        | 0.000169        | 0.000169        | 0.999961        | 0.000875        |                 | 0.000169         | 0.000169         | 0.000169         | 0.000169         | 0.000169         | 0.000169         | 0.000176         | 0.000170         | 0.000169         |
| LuP 3-7 {10}      | 0.000732        | 0.999999        | 0.000169        | 0.018781        | 0.000169        | 0.000169        | 0.000169        | 0.102239        | 0.000169        |                  | 0.000169         | 0.000169         | 0.993595         | 0.000169         | 0.000169         | 0.000169         | 0.000169         | 0.000169         |
| 9503 UR {11}      | 0.000169        | 0.000169        | 0.000169        | 0.000169        | 0.000169        | 0.000169        | 0.000169        | 0.000169        | 0.000169        | 0.000169         |                  | 0.000169         | 0.000169         | 0.000169         | 0.000169         | 0.000319         | 0.001288         | 0.364333         |
| 9503 II/7 UR {12} | 0.000169        | 0.000169        | 0.000169        | 0.000169        | 0.000169        | 0.000169        | 0.000169        | 0.000169        | 0.000169        | 0.000169         | 0.000169         |                  | 0.000169         | 0.000169         | 0.884055         | 0.000169         | 0.000169         | 0.000209         |
| 4C S9 {13}        | 0.030861        | 1.000000        | 0.000169        | 0.410659        | 0.000169        | 0.000169        | 0.000169        | 0.002612        | 0.000169        | 0.993595         | 0.000169         | 0.000169         |                  | 0.000169         | 0.000169         | 0.000169         | 0.000169         | 0.000169         |
| 9501 UR {14}      | 0.000169        | 0.000169        | 0.000169        | 0.000169        | 0.000169        | 0.000169        | 0.000169        | 0.000169        | 0.000169        | 0.000169         | 0.000169         | 0.000169         | 0.000169         |                  | 0.000169         | 0.000169         | 0.000169         | 0.000169         |
| SH 7 UR {15}      | 0.000169        | 0.000169        | 0.000169        | 0.000169        | 0.000169        | 0.000169        | 0.000169        | 0.000169        | 0.000169        | 0.000169         | 0.000169         | 0.884055         | 0.000169         | 0.000169         |                  | 0.000169         | 0.000169         | 0.000246         |
| LuP 4/20 A {16}   | 0.000169        | 0.000169        | 0.167614        | 0.000169        | 0.000169        | 0.000169        | 0.000359        | 0.000169        | 0.000176        | 0.000169         | 0.000319         | 0.000169         | 0.000169         | 0.000169         | 0.000169         |                  | 1.000000         | 0.000169         |
| LuP 4/20 B {17}   | 0.000169        | 0.000169        | 0.037470        | 0.000169        | 0.000169        | 0.000169        | 0.000190        | 0.000169        | 0.000170        | 0.000169         | 0.001288         | 0.000169         | 0.000169         | 0.000169         | 0.000169         | 1.000000         |                  | 0.000169         |
| SH 6 UR {18}      | 0.000169        | 0.000169        | 0.000169        | 0.000169        | 0.000169        | 0.000169        | 0.000169        | 0.000169        | 0.000169        | 0.000169         | 0.364333         | 0.000209         | 0.000169         | 0.000169         | 0.000246         | 0.000169         | 0.000169         |                  |

The values marked in red indicate statistically significant differences at  $p < 0.05$  (Tukey's test).

Table S6. Statistical differences for results obtained with FRAP method for paulownia leaf petioles

| Zmn1              | {1}<br>M=26.694 | {2}<br>M=78.454 | {3}<br>M=88.569 | {4}<br>M=27.829 | {5}<br>M=58.120 | {6}<br>M=80.670 | {7}<br>M=73.372 | {8}<br>M=66.217 | {9}<br>M=30.592 | {10}<br>M=70.263 | {11}<br>M=78.898 | {12}<br>M=55.164 | {13}<br>M=138.85 | {14}<br>M=101.50 | {15}<br>M=70.954 | {16}<br>M=113.78 | {17}<br>M=60.345 | {18}<br>M=51.760 |
|-------------------|-----------------|-----------------|-----------------|-----------------|-----------------|-----------------|-----------------|-----------------|-----------------|------------------|------------------|------------------|------------------|------------------|------------------|------------------|------------------|------------------|
| OX 3 {1}          |                 | 0.000169        | 0.000169        | 1.000000        | 0.000169        | 0.000169        | 0.000169        | 0.000169        | 0.999716        | 0.000169         | 0.000169         | 0.000367         | 0.000169         | 0.000169         | 0.000169         | 0.000169         | 0.000169         | 0.000171         |
| SLO NN1 {2}       | 0.000169        |                 | 0.327524        | 0.000169        | 0.000335        | 1.000000        | 0.992535        | 0.099228        | 0.000169        | 0.679864         | 1.000000         | 0.004611         | 0.000169         | 0.000181         | 0.800185         | 0.000169         | 0.001327         | 0.000169         |
| ZAL A1 {3}        | 0.000169        | 0.327524        |                 | 0.000169        | 0.000169        | 0.733090        | 0.012247        | 0.000193        | 0.000169        | 0.001153         | 0.401104         | 0.000176         | 0.000169         | 0.063061         | 0.001908         | 0.000170         | 0.000169         | 0.000169         |
| COT 1 {4}         | 1.000000        | 0.000169        | 0.000169        |                 | 0.000169        | 0.000169        | 0.000169        | 0.000169        | 0.999998        | 0.000169         | 0.000169         | 0.000578         | 0.000169         | 0.000169         | 0.000169         | 0.000169         | 0.000169         | 0.000174         |
| US 1 {5}          | 0.000169        | 0.000335        | 0.000169        | 0.000169        |                 | 0.000189        | 0.011752        | 0.697260        | 0.000169        | 0.105363         | 0.000276         | 1.000000         | 0.000169         | 0.000169         | 0.067161         | 0.000169         | 1.000000         | 0.937085         |
| LUP 1-12 {6}      | 0.000169        | 1.000000        | 0.733090        | 0.000169        | 0.000189        |                 | 0.830820        | 0.021390        | 0.000169        | 0.283913         | 1.000000         | 0.001399         | 0.000169         | 0.000271         | 0.393308         | 0.000169         | 0.000337         | 0.000169         |
| WEG 9 PEG {7}     | 0.000169        | 0.992535        | 0.012247        | 0.000169        | 0.011752        | 0.830820        |                 | 0.851081        | 0.000169        | 0.999989         | 0.982209         | 0.065359         | 0.000169         | 0.000169         | 1.000000         | 0.000169         | 0.058983         | 0.000218         |
| A4 ST A2 {8}      | 0.000169        | 0.099228        | 0.000193        | 0.000169        | 0.697260        | 0.021390        | 0.851081        |                 | 0.000169        | 0.999532         | 0.074364         | 0.747783         | 0.000169         | 0.000169         | 0.996626         | 0.000169         | 0.968372         | 0.021321         |
| Lu Hg 12 {9}      | 0.999716        | 0.000169        | 0.000169        | 0.999998        | 0.000169        | 0.000169        | 0.000169        | 0.000169        |                 | 0.000169         | 0.000169         | 0.002287         | 0.000169         | 0.000169         | 0.000169         | 0.000169         | 0.000169         | 0.000244         |
| LuP 3-7 {10}      | 0.000169        | 0.679864        | 0.001153        | 0.000169        | 0.105363        | 0.283913        | 0.999989        | 0.999532        | 0.000169        |                  | 0.595101         | 0.247170         | 0.000169         | 0.000169         | 1.000000         | 0.000169         | 0.359313         | 0.001002         |
| 9503 UR {11}      | 0.000169        | 1.000000        | 0.401104        | 0.000169        | 0.000276        | 1.000000        | 0.982209        | 0.074364        | 0.000169        | 0.595101         |                  | 0.003610         | 0.000169         | 0.000188         | 0.725073         | 0.000169         | 0.000969         | 0.000169         |
| 9503 II/7 UR {12} | 0.000367        | 0.004611        | 0.000176        | 0.000578        | 1.000000        | 0.001399        | 0.065359        | 0.747783        | 0.002287        | 0.247170         | 0.003610         |                  | 0.000169         | 0.000169         | 0.189285         | 0.000169         | 0.999879         | 1.000000         |
| 4C S9 {13}        | 0.000169        | 0.000169        | 0.000169        | 0.000169        | 0.000169        | 0.000169        | 0.000169        | 0.000169        | 0.000169        | 0.000169         | 0.000169         | 0.000169         |                  | 0.000169         | 0.000169         | 0.000171         | 0.000169         | 0.000169         |
| 9501 UR {14}      | 0.000169        | 0.000181        | 0.063061        | 0.000169        | 0.000169        | 0.000271        | 0.000169        | 0.000169        | 0.000169        | 0.000169         | 0.000188         | 0.000169         | 0.000169         |                  | 0.000169         | 0.096151         | 0.000169         | 0.000169         |
| SH 7 UR {15}      | 0.000169        | 0.800185        | 0.001908        | 0.000169        | 0.067161        | 0.393308        | 1.000000        | 0.996626        | 0.000169        | 1.000000         | 0.725073         | 0.189285         | 0.000169         | 0.000169         |                  | 0.000169         | 0.256089         | 0.000627         |
| LuP 4/20 A {16}   | 0.000169        | 0.000169        | 0.000170        | 0.000169        | 0.000169        | 0.000169        | 0.000169        | 0.000169        | 0.000169        | 0.000169         | 0.000169         | 0.000169         | 0.000171         | 0.096151         | 0.000169         |                  | 0.000169         | 0.000169         |
| LuP 4/20 B {17}   | 0.000169        | 0.001327        | 0.000169        | 0.000169        | 1.000000        | 0.000337        | 0.058983        | 0.968372        | 0.000169        | 0.359313         | 0.000969         | 0.999879         | 0.000169         | 0.000169         | 0.256089         | 0.000169         |                  | 0.604632         |
| SH 6 UR {18}      | 0.000171        | 0.000169        | 0.000169        | 0.000174        | 0.937085        | 0.000169        | 0.000218        | 0.021321        | 0.000244        | 0.001002         | 0.000169         | 1.000000         | 0.000169         | 0.000169         | 0.000627         | 0.000169         | 0.604632         |                  |

The values marked in red indicate statistically significant differences at  $p < 0.05$  (Tukey's test).



Table S7. Statistical differences for results obtained with DPPH method for paulownia leaf petioles

| Zmn1              | {1}<br>M=18,133 | {2}<br>M=61,187 | {3}<br>M=74,690 | {4}<br>M=23,330 | {5}<br>M=31,380 | {6}<br>M=46,250 | {7}<br>M=58,927 | {8}<br>M=56,217 | {9}<br>M=24,180 | {10}<br>M=57,233 | {11}<br>M=63,840 | {12}<br>M=63,840 | {13}<br>M=83,957 | {14}<br>M=82,660 | {15}<br>M=81,870 | {16}<br>M=81,640 | {17}<br>M=51,243 | {18}<br>M=41,697 |
|-------------------|-----------------|-----------------|-----------------|-----------------|-----------------|-----------------|-----------------|-----------------|-----------------|------------------|------------------|------------------|------------------|------------------|------------------|------------------|------------------|------------------|
| OX 3 {1}          |                 | 0.000169        | 0.000169        | 0.080362        | 0.000169        | 0.000169        | 0.000169        | 0.000169        | 0.018918        | 0.000169         | 0.000169         | 0.000169         | 0.000169         | 0.000169         | 0.000169         | 0.000169         | 0.000169         | 0.000169         |
| SLO NN1 {2}       | 0.000169        |                 | 0.000169        | 0.000169        | 0.000169        | 0.000169        | 0.984113        | 0.114162        | 0.000169        | 0.421127         | 0.932629         | 0.997994         | 0.000169         | 0.000169         | 0.000169         | 0.000169         | 0.000174         | 0.000169         |
| ZAL A1 {3}        | 0.000169        | 0.000169        |                 | 0.000169        | 0.000169        | 0.000169        | 0.000169        | 0.000169        | 0.000169        | 0.000169         | 0.000170         | 0.000972         | 0.000192         | 0.000600         | 0.002318         | 0.003556         | 0.000169         | 0.000169         |
| COT 1 {4}         | 0.080362        | 0.000169        | 0.000169        |                 | 0.000525        | 0.000169        | 0.000169        | 0.000169        | 1.000000        | 0.000169         | 0.000169         | 0.000169         | 0.000169         | 0.000169         | 0.000169         | 0.000169         | 0.000169         | 0.000169         |
| US 1 {5}          | 0.000169        | 0.000169        | 0.000169        | 0.000525        |                 | 0.000169        | 0.000169        | 0.000169        | 0.002234        | 0.000169         | 0.000169         | 0.000169         | 0.000169         | 0.000169         | 0.000169         | 0.000169         | 0.000169         | 0.000171         |
| LUP 1-12 {6}      | 0.000169        | 0.000169        | 0.000169        | 0.000169        | 0.000169        |                 | 0.000169        | 0.000173        | 0.000169        | 0.000169         | 0.000169         | 0.000169         | 0.000169         | 0.000169         | 0.000169         | 0.000169         | 0.110211         | 0.206736         |
| WEG 9 PEG {7}     | 0.000169        | 0.984113        | 0.000169        | 0.000169        | 0.000169        | 0.000169        |                 | 0.920491        | 0.000169        | 0.999453         | 0.124259         | 0.640453         | 0.000169         | 0.000169         | 0.000169         | 0.000169         | 0.000947         | 0.000169         |
| A4 ST A2 {8}      | 0.000169        | 0.114162        | 0.000169        | 0.000169        | 0.000169        | 0.000173        | 0.920491        |                 | 0.000169        | 1.000000         | 0.001054         | 0.058765         | 0.000169         | 0.000169         | 0.000169         | 0.000169         | 0.113591         | 0.000169         |
| Lu Hg 12 {9}      | 0.018918        | 0.000169        | 0.000169        | 1.000000        | 0.002234        | 0.000169        | 0.000169        | 0.000169        |                 | 0.000169         | 0.000169         | 0.000169         | 0.000169         | 0.000169         | 0.000169         | 0.000169         | 0.000169         | 0.000169         |
| LuP 3-7 {10}      | 0.000169        | 0.421127        | 0.000169        | 0.000169        | 0.000169        | 0.000169        | 0.999453        | 1.000000        | 0.000169        |                  | 0.006777         | 0.175882         | 0.000169         | 0.000169         | 0.000169         | 0.000169         | 0.020950         | 0.000169         |
| 9503 UR {11}      | 0.000169        | 0.932629        | 0.000170        | 0.000169        | 0.000169        | 0.000169        | 0.124259        | 0.001054        | 0.000169        | 0.006777         |                  | 1.000000         | 0.000169         | 0.000169         | 0.000169         | 0.000169         | 0.000169         | 0.000169         |
| 9503 II/7 UR {12} | 0.000169        | 0.997994        | 0.000972        | 0.000169        | 0.000169        | 0.000169        | 0.640453        | 0.058765        | 0.000169        | 0.175882         | 1.000000         |                  | 0.000169         | 0.000169         | 0.000169         | 0.000169         | 0.000222         | 0.000169         |
| 4C S9 {13}        | 0.000169        | 0.000169        | 0.000192        | 0.000169        | 0.000169        | 0.000169        | 0.000169        | 0.000169        | 0.000169        | 0.000169         | 0.000169         | 0.000169         |                  | 0.999988         | 0.993115         | 0.979724         | 0.000169         | 0.000169         |
| 9501 UR {14}      | 0.000169        | 0.000169        | 0.000600        | 0.000169        | 0.000169        | 0.000169        | 0.000169        | 0.000169        | 0.000169        | 0.000169         | 0.000169         | 0.000169         | 0.999988         |                  | 1.000000         | 1.000000         | 0.000169         | 0.000169         |
| SH 7 UR {15}      | 0.000169        | 0.000169        | 0.002318        | 0.000169        | 0.000169        | 0.000169        | 0.000169        | 0.000169        | 0.000169        | 0.000169         | 0.000169         | 0.000169         | 0.993115         | 1.000000         |                  | 1.000000         | 0.000169         | 0.000169         |
| LuP 4/20 A {16}   | 0.000169        | 0.000169        | 0.003556        | 0.000169        | 0.000169        | 0.000169        | 0.000169        | 0.000169        | 0.000169        | 0.000169         | 0.000169         | 0.000169         | 0.979724         | 1.000000         | 1.000000         |                  | 0.000169         | 0.000169         |
| LuP 4/20 B {17}   | 0.000169        | 0.000174        | 0.000169        | 0.000169        | 0.000169        | 0.110211        | 0.000947        | 0.113591        | 0.000169        | 0.020950         | 0.000169         | 0.000222         | 0.000169         | 0.000169         | 0.000169         | 0.000169         |                  | 0.000181         |
| SH 6 UR {18}      | 0.000169        | 0.000169        | 0.000169        | 0.000169        | 0.000171        | 0.206736        | 0.000169        | 0.000169        | 0.000169        | 0.000169         | 0.000169         | 0.000169         | 0.000169         | 0.000169         | 0.000169         | 0.000169         | 0.000181         |                  |

The values marked in red indicate statistically significant differences at  $p < 0.05$  (Tukey's test).

Table S8. Statistical differences for results obtained with ABTS method for paulownia leaf petioles

| Zmn1              | {1}<br>M=140,96 | {2}<br>M=328,40 | {3}<br>M=393,60 | {4}<br>M=132,12 | {5}<br>M=118,01 | {6}<br>M=221,16 | {7}<br>M=328,37 | {8}<br>M=276,96 | {9}<br>M=153,13 | {10}<br>M=333,34 | {11}<br>M=370,38 | {12}<br>M=311,23 | {13}<br>M=587,08 | {14}<br>M=490,34 | {15}<br>M=331,13 | {16}<br>M=436,17 | {17}<br>M=267,01 | {18}<br>M=194,04 |
|-------------------|-----------------|-----------------|-----------------|-----------------|-----------------|-----------------|-----------------|-----------------|-----------------|------------------|------------------|------------------|------------------|------------------|------------------|------------------|------------------|------------------|
| OX 3 {1}          |                 | 0.000169        | 0.000169        | 1.000000        | 0.999138        | 0.016293        | 0.000169        | 0.000171        | 1.000000        | 0.000169         | 0.000169         | 0.000196         | 0.000169         | 0.000169         | 0.000169         | 0.000169         | 0.000179         | 0.377695         |
| SLO NN1 {2}       | 0.000169        |                 | 0.111925        | 0.000169        | 0.000169        | 0.000431        | 1.000000        | 0.430580        | 0.000169        | 1.000000         | 0.757929         | 1.000000         | 0.000169         | 0.000169         | 1.000000         | 0.000409         | 0.170976         | 0.000171         |
| ZAL A1 {3}        | 0.000169        | 0.111925        |                 | 0.000169        | 0.000169        | 0.000169        | 0.111538        | 0.000221        | 0.000169        | 0.192588         | 0.998999         | 0.236260         | 0.000169         | 0.001573         | 0.152145         | 0.739005         | 0.000178         | 0.000169         |
| COT 1 {4}         | 1.000000        | 0.000169        | 0.000169        |                 | 0.999999        | 0.004669        | 0.000169        | 0.000169        | 0.999731        | 0.000169         | 0.000169         | 0.000178         | 0.000169         | 0.000169         | 0.000169         | 0.000169         | 0.000171         | 0.161517         |
| US 1 {5}          | 0.999138        | 0.000169        | 0.000169        | 0.999999        |                 | 0.000683        | 0.000169        | 0.000169        | 0.926190        | 0.000169         | 0.000169         | 0.000170         | 0.000169         | 0.000169         | 0.000169         | 0.000169         | 0.000169         | 0.028771         |
| LUP 1-12 {6}      | 0.016293        | 0.000431        | 0.000169        | 0.004669        | 0.000683        |                 | 0.000432        | 0.297945        | 0.080012        | 0.000281         | 0.000169         | 0.132930         | 0.000169         | 0.000169         | 0.000338         | 0.000169         | 0.626565         | 0.993602         |
| WEG 9 PEG {7}     | 0.000169        | 1.000000        | 0.111538        | 0.000169        | 0.000169        | 0.000432        |                 | 0.431577        | 0.000169        | 1.000000         | 0.756980         | 1.000000         | 0.000169         | 0.000169         | 1.000000         | 0.000408         | 0.171524         | 0.000171         |
| A4 ST A2 {8}      | 0.000171        | 0.430580        | 0.000221        | 0.000169        | 0.000169        | 0.297945        | 0.431577        |                 | 0.000183        | 0.282432         | 0.002496         | 0.998286         | 0.000169         | 0.000169         | 0.344500         | 0.000169         | 1.000000         | 0.011150         |
| Lu Hg 12 {9}      | 1.000000        | 0.000169        | 0.000169        | 0.999731        | 0.926190        | 0.080012        | 0.000169        | 0.000183        |                 | 0.000169         | 0.000169         | 0.000295         | 0.000169         | 0.000169         | 0.000169         | 0.000169         | 0.000253         | 0.790797         |
| LuP 3-7 {10}      | 0.000169        | 1.000000        | 0.192588        | 0.000169        | 0.000169        | 0.000281        | 1.000000        | 0.282432        | 0.000169        |                  | 0.890085         | 0.999997         | 0.000169         | 0.000169         | 1.000000         | 0.000715         | 0.098043         | 0.000170         |
| 9503 UR {11}      | 0.000169        | 0.757929        | 0.998999        | 0.000169        | 0.000169        | 0.000169        | 0.756980        | 0.002496        | 0.000169        | 0.890085         |                  | 0.762799         | 0.000169         | 0.000198         | 0.837478         | 0.104461         | 0.000666         | 0.000169         |
| 9503 II/7 UR {12} | 0.000196        | 1.000000        | 0.236260        | 0.000178        | 0.000170        | 0.132930        | 1.000000        | 0.998286        | 0.000295        | 0.999997         | 0.762799         |                  | 0.000169         | 0.000178         | 0.999999         | 0.005156         | 0.972753         | 0.011235         |
| 4C S9 {13}        | 0.000169        | 0.000169        | 0.000169        | 0.000169        | 0.000169        | 0.000169        | 0.000169        | 0.000169        | 0.000169        | 0.000169         | 0.000169         | 0.000169         |                  | 0.001573         | 0.000169         | 0.000169         | 0.000169         | 0.000169         |
| 9501 UR {14}      | 0.000169        | 0.000169        | 0.001573        | 0.000169        | 0.000169        | 0.000169        | 0.000169        | 0.000169        | 0.000169        | 0.000169         | 0.000198         | 0.000178         | 0.001573         |                  | 0.000169         | 0.344500         | 0.000169         | 0.000169         |
| SH 7 UR {15}      | 0.000169        | 1.000000        | 0.152145        | 0.000169        | 0.000169        | 0.000338        | 1.000000        | 0.344500        | 0.000169        | 1.000000         | 0.837478         | 0.999999         | 0.000169         | 0.000169         |                  | 0.000552         | 0.126629         | 0.000170         |
| LuP 4/20 A {16}   | 0.000169        | 0.000409        | 0.739005        | 0.000169        | 0.000169        | 0.000408        | 0.000169        | 0.000169        | 0.000169        | 0.000715         | 0.104461         | 0.005156         | 0.000169         | 0.344500         | 0.000552         |                  | 0.000169         | 0.000169         |
| LuP 4/20 B {17}   | 0.000179        | 0.170976        | 0.000178        | 0.000171        | 0.000169        | 0.626565        | 0.171524        | 1.000000        | 0.000253        | 0.098043         | 0.000666         | 0.972753         | 0.000169         | 0.000169         | 0.126629         | 0.000169         |                  | 0.043052         |
| SH 6 UR {18}      | 0.377695        | 0.000171        | 0.000169        | 0.161517        | 0.028771        | 0.993602        | 0.000171        | 0.011150        | 0.790797        | 0.000170         | 0.000169         | 0.011235         | 0.000169         | 0.000169         | 0.000170         | 0.000169         | 0.043052         |                  |

The values marked in red indicate statistically significant differences at  $p < 0.05$  (Tukey's test).



Table S9. Statistical differences for total phenolic content (TPC) for paulownia leaf petioles

| Zmn1              | {1}<br>M=5,8929 | {2}<br>M=15,022 | {3}<br>M=17,388 | {4}<br>M=6,3839 | {5}<br>M=13,530 | {6}<br>M=21,250 | {7}<br>M=13,951 | {8}<br>M=13,259 | {9}<br>M=6,7188 | {10}<br>M=11,696 | {11}<br>M=15,223 | {12}<br>M=13,304 | {13}<br>M=24,844 | {14}<br>M=22,009 | {15}<br>M=14,598 | {16}<br>M=20,580 | {17}<br>M=10,647 | {18}<br>M=10,313 |
|-------------------|-----------------|-----------------|-----------------|-----------------|-----------------|-----------------|-----------------|-----------------|-----------------|------------------|------------------|------------------|------------------|------------------|------------------|------------------|------------------|------------------|
| OX 3 {1}          |                 | 0.000169        | 0.000169        | 0.999531        | 0.000169        | 0.000169        | 0.000169        | 0.000169        | 0.894496        | 0.000169         | 0.000169         | 0.000169         | 0.000169         | 0.000169         | 0.000169         | 0.000169         | 0.000169         | 0.000169         |
| SLO NN1 {2}       | 0.000169        |                 | 0.000515        | 0.000169        | 0.095565        | 0.000169        | 0.557816        | 0.020208        | 0.000169        | 0.000169         | 1.000000         | 0.343745         | 0.000169         | 0.000169         | 0.999939         | 0.000169         | 0.000169         | 0.000169         |
| ZAL A1 {3}        | 0.000169        | 0.000515        |                 | 0.000169        | 0.000169        | 0.000169        | 0.000169        | 0.000169        | 0.000169        | 0.000169         | 0.001614         | 0.000175         | 0.000169         | 0.000169         | 0.000182         | 0.000170         | 0.000169         | 0.000169         |
| COT 1 {4}         | 0.999531        | 0.000169        | 0.000169        |                 | 0.000169        | 0.000169        | 0.000169        | 0.999998        | 0.000169        | 0.000169         | 0.000169         | 0.000169         | 0.000169         | 0.000169         | 0.000169         | 0.000169         | 0.000169         | 0.000169         |
| US 1 {5}          | 0.000169        | 0.095565        | 0.000169        | 0.000169        |                 | 0.000169        | 0.999945        | 1.000000        | 0.000169        | 0.013110         | 0.030853         | 1.000000         | 0.000169         | 0.000169         | 0.562926         | 0.000169         | 0.000175         | 0.000169         |
| LUP 1-12 {6}      | 0.000169        | 0.000169        | 0.000169        | 0.000169        | 0.000169        |                 | 0.000169        | 0.000169        | 0.000169        | 0.000169         | 0.000169         | 0.000169         | 0.000169         | 0.945261         | 0.000169         | 0.982489         | 0.000169         | 0.000169         |
| WEG 9 PEG {7}     | 0.000169        | 0.557816        | 0.000169        | 0.000169        | 0.999945        | 0.000169        |                 | 0.975947        | 0.000169        | 0.000947         | 0.273168         | 0.999819         | 0.000169         | 0.000169         | 0.987564         | 0.000169         | 0.000169         | 0.000169         |
| A4 ST A2 {8}      | 0.000169        | 0.020208        | 0.000169        | 0.000169        | 1.000000        | 0.000169        | 0.975947        |                 | 0.000169        | 0.065380         | 0.005746         | 1.000000         | 0.000169         | 0.000169         | 0.203570         | 0.000169         | 0.000223         | 0.000173         |
| Lu Hg 12 {9}      | 0.894496        | 0.000169        | 0.000169        | 0.999998        | 0.000169        | 0.000169        | 0.000169        | 0.000169        |                 | 0.000169         | 0.000169         | 0.000169         | 0.000169         | 0.000169         | 0.000169         | 0.000169         | 0.000169         | 0.000169         |
| LuP 3-7 {10}      | 0.000169        | 0.000169        | 0.000169        | 0.000169        | 0.013110        | 0.000169        | 0.000947        | 0.065380        | 0.000169        |                  | 0.000169         |                  | 0.456246         | 0.000169         | 0.000174         | 0.000169         | 0.593346         | 0.165155         |
| 9503 UR {11}      | 0.000169        | 1.000000        | 0.001614        | 0.000169        | 0.030853        | 0.000169        | 0.273168        | 0.005746        | 0.000169        | 0.000169         |                  | 0.187242         | 0.000169         | 0.000169         | 0.991399         | 0.000169         | 0.000169         | 0.000169         |
| 9503 II/7 UR {12} | 0.000169        | 0.343745        | 0.000175        | 0.000169        | 1.000000        | 0.000169        | 0.999819        | 1.000000        | 0.000169        | 0.456246         | 0.187242         |                  | 0.000169         | 0.000169         | 0.793393         | 0.000169         | 0.009913         | 0.002200         |
| 4C S9 {13}        | 0.000169        | 0.000169        | 0.000169        | 0.000169        | 0.000169        | 0.000169        | 0.000169        | 0.000169        | 0.000169        | 0.000169         | 0.000169         | 0.000169         |                  | 0.000178         | 0.000169         | 0.000169         | 0.000169         | 0.000169         |
| 9501 UR {14}      | 0.000169        | 0.000169        | 0.000169        | 0.000169        | 0.000169        | 0.945261        | 0.000169        | 0.000169        | 0.000169        | 0.000169         | 0.000169         | 0.000169         | 0.000178         |                  | 0.000169         | 0.132708         | 0.000169         | 0.000169         |
| SH 7 UR {15}      | 0.000169        | 0.999939        | 0.000182        | 0.000169        | 0.562926        | 0.000169        | 0.987564        | 0.203570        | 0.000169        | 0.000174         | 0.991399         | 0.793393         | 0.000169         | 0.000169         |                  | 0.000169         | 0.000169         | 0.000169         |
| LuP 4/20 A {16}   | 0.000169        | 0.000169        | 0.000170        | 0.000169        | 0.000169        | 0.982489        | 0.000169        | 0.000169        | 0.000169        | 0.000169         | 0.000169         | 0.000169         | 0.000169         | 0.132708         | 0.000169         |                  | 0.000169         | 0.000169         |
| LuP 4/20 B {17}   | 0.000169        | 0.000169        | 0.000169        | 0.000169        | 0.000175        | 0.000169        | 0.000169        | 0.000223        | 0.000169        | 0.593346         | 0.000169         | 0.009913         | 0.000169         | 0.000169         | 0.000169         | 0.000169         |                  | 0.999998         |
| SH 6 UR {18}      | 0.000169        | 0.000169        | 0.000169        | 0.000169        | 0.000169        | 0.000169        | 0.000169        | 0.000173        | 0.000169        | 0.165155         | 0.000169         | 0.002200         | 0.000169         | 0.000169         | 0.000169         | 0.000169         | 0.999998         |                  |

The values marked in red indicate statistically significant differences at  $p < 0.05$  (Tukey's test).

Table S10. Statistical differences for total flavonoid content (TFC) for paulownia leaf petioles

| Zmn1              | {1}<br>M=2,1298 | {2}<br>M=4,4198 | {3}<br>M=5,8053 | {4}<br>M=2,4389 | {5}<br>M=1,6600 | {6}<br>M=2,4800 | {7}<br>M=7,3053 | {8}<br>M=4,9580 | {9}<br>M=2,8969 | {10}<br>M=3,6870 | {11}<br>M=4,7176 | {12}<br>M=3,9160 | {13}<br>M=8,0496 | {14}<br>M=6,8244 | {15}<br>M=4,6489 | {16}<br>M=4,7977 | {17}<br>M=3,8931 | {18}<br>M=3,3550 |
|-------------------|-----------------|-----------------|-----------------|-----------------|-----------------|-----------------|-----------------|-----------------|-----------------|------------------|------------------|------------------|------------------|------------------|------------------|------------------|------------------|------------------|
| OX 3 {1}          |                 | 0.000169        | 0.000169        | 0.987650        | 0.696942        | 0.959400        | 0.000169        | 0.000169        | 0.051448        | 0.000169         | 0.000169         | 0.000211         | 0.000169         | 0.000169         | 0.000169         | 0.000169         | 0.000169         | 0.000247         |
| SLO NN1 {2}       | 0.000169        |                 | 0.000174        | 0.000169        | 0.000169        | 0.000169        | 0.000169        | 0.472049        | 0.000170        | 0.076712         | 0.991699         | 0.952946         | 0.000169         | 0.000169         | 0.999662         | 0.923918         | 0.509387         | 0.001111         |
| ZAL A1 {3}        | 0.000169        | 0.000174        |                 | 0.000169        | 0.000169        | 0.000169        | 0.000170        | 0.019061        | 0.000169        | 0.000839         | 0.000181         | 0.000169         | 0.000169         | 0.001975         | 0.000404         | 0.002294         | 0.000169         | 0.000169         |
| COT 1 {4}         | 0.987650        | 0.000169        | 0.000169        |                 | 0.044702        | 1.000000        | 0.000169        | 0.000169        | 0.733608        | 0.000223         | 0.000169         | 0.001428         | 0.000169         | 0.000169         | 0.000169         | 0.000169         | 0.000171         | 0.007781         |
| US 1 {5}          | 0.696942        | 0.000169        | 0.000169        | 0.044702        |                 | 0.026979        | 0.000169        | 0.000169        | 0.000233        | 0.000169         | 0.000169         | 0.000169         | 0.000169         | 0.000169         | 0.000169         | 0.000169         | 0.000169         | 0.000169         |
| LUP 1-12 {6}      | 0.959400        | 0.000169        | 0.000169        | 1.000000        | 0.026979        |                 | 0.000169        | 0.000169        | 0.846476        | 0.000273         | 0.000169         | 0.002072         | 0.000169         | 0.000169         | 0.000169         | 0.000169         | 0.000172         | 0.013341         |
| WEG 9 PEG {7}     | 0.000169        | 0.000169        | 0.000170        | 0.000169        | 0.000169        | 0.000169        |                 | 0.000169        | 0.000169        | 0.000169         | 0.000169         | 0.000169         | 0.067282         | 0.661024         | 0.000169         | 0.000169         | 0.000169         | 0.000169         |
| A4 ST A2 {8}      | 0.000169        | 0.472049        | 0.019061        | 0.000169        | 0.000169        | 0.000169        | 0.000169        |                 | 0.000169        | 0.000206         | 0.999356         | 0.073318         | 0.000169         | 0.000169         | 0.987650         | 0.999998         | 0.001111         | 0.000169         |
| Lu Hg 12 {9}      | 0.051448        | 0.000170        | 0.000169        | 0.733608        | 0.000233        | 0.846476        | 0.000169        | 0.000169        |                 | 0.039063         | 0.000169         | 0.088039         | 0.000169         | 0.000169         | 0.000169         | 0.000169         | 0.002667         | 0.733608         |
| LuP 3-7 {10}      | 0.000169        | 0.076712        | 0.000169        | 0.000223        | 0.000169        | 0.000273        | 0.000169        | 0.000206        | 0.039063        |                  | 0.001704         | 0.999998         | 0.000169         | 0.000169         | 0.004223         | 0.000646         | 0.999922         | 0.974999         |
| 9503 UR {11}      | 0.000169        | 0.991699        | 0.000839        | 0.000169        | 0.000169        | 0.000169        | 0.000169        | 0.999356        | 0.000169        | 0.001704         |                  | 0.383892         | 0.000169         | 0.000169         | 1.000000         | 1.000000         | 0.025520         | 0.000177         |
| 9503 II/7 UR {12} | 0.000211        | 0.952946        | 0.000181        | 0.001428        | 0.000169        | 0.002072        | 0.000169        | 0.073318        | 0.088039        | 0.999998         | 0.383892         |                  | 0.000169         | 0.000169         | 0.537487         | 0.237977         | 1.000000         | 0.890556         |
| 4C S9 {13}        | 0.000169        | 0.000169        | 0.000169        | 0.000169        | 0.000169        | 0.000169        | 0.067282        | 0.000169        | 0.000169        | 0.000169         | 0.000169         | 0.000169         |                  | 0.000247         | 0.000169         | 0.000169         | 0.000169         | 0.000169         |
| 9501 UR {14}      | 0.000169        | 0.000169        | 0.001975        | 0.000169        | 0.000169        | 0.000169        | 0.661024        | 0.000169        | 0.000169        | 0.000169         | 0.000169         | 0.000169         | 0.000247         |                  | 0.000169         | 0.000169         | 0.000169         | 0.000169         |
| SH 7 UR {15}      | 0.000169        | 0.999662        | 0.000404        | 0.000169        | 0.000169        | 0.000169        | 0.000169        | 0.987650        | 0.000169        | 0.004223         | 1.000000         | 0.537487         | 0.000169         | 0.000169         |                  | 0.999999         | 0.058889         | 0.000194         |
| LuP 4/20 A {16}   | 0.000169        | 0.923918        | 0.002294        | 0.000169        | 0.000169        | 0.000169        | 0.999998        | 0.000169        | 0.000169        | 0.000646         | 1.000000         | 0.237977         | 0.000169         | 0.000169         | 0.999999         |                  | 0.009050         | 0.000171         |
| LuP 4/20 B {17}   | 0.000169        | 0.509387        | 0.000169        | 0.000171        | 0.000169        | 0.000172        | 0.000169        | 0.001111        | 0.002667        | 0.999922         | 0.025520         | 1.000000         | 0.000169         | 0.000169         | 0.058889         | 0.009050         |                  | 0.472049         |
| SH 6 UR {18}      | 0.000247        | 0.001111        | 0.000169        | 0.007781        | 0.000169        | 0.013341        | 0.000169        | 0.000169        | 0.733608        | 0.974999         | 0.000177         | 0.890556         | 0.000169         | 0.000169         | 0.000194         | 0.000171         | 0.472049         |                  |

The values marked in red indicate statistically significant differences at  $p < 0.05$  (Tukey's test).

Table S11. Correlation matrix for paulownia leaf blades

|      | TPC      | DPPH     | FRAP     | TFC      | ABTS     |
|------|----------|----------|----------|----------|----------|
| TPC  | 1,000000 | 0,801494 | 0,917709 | 0,584686 | 0,896147 |
| DPPH | 0,801494 | 1,000000 | 0,866676 | 0,826273 | 0,590810 |
| FRAP | 0,917709 | 0,866676 | 1,000000 | 0,723970 | 0,752522 |
| TFC  | 0,584686 | 0,826273 | 0,723970 | 1,000000 | 0,311719 |
| ABTS | 0,896147 | 0,590810 | 0,752522 | 0,311719 | 1,000000 |

Pearson's coefficients marked in red are statistically significant at  $p < 0.05$

Table S12. Correlation matrix for paulownia leaf petioles

|      | TPC      | DPPH     | FRAP     | TFC      | ABTS     |
|------|----------|----------|----------|----------|----------|
| TPC  | 1,000000 | 0,795201 | 0,934936 | 0,634409 | 0,794822 |
| DPPH | 0,795201 | 1,000000 | 0,860624 | 0,787495 | 0,910939 |
| FRAP | 0,934936 | 0,860624 | 1,000000 | 0,745057 | 0,903485 |
| TFC  | 0,634409 | 0,787495 | 0,745057 | 1,000000 | 0,866163 |
| ABTS | 0,794822 | 0,910939 | 0,903485 | 0,866163 | 1,000000 |

Pearson's coefficients marked in red are statistically significant at  $p < 0.05$
